# Supplementary material for: Psychological Distress among Italian University Students Compared to General Workers during the COVID-19 Pandemic
Source: MDPI journal article supplement (doi:10.3390/ijerph18052503), 2021-03-03
Supplement: s1 [file s1]

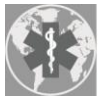

**Table S1.** Hierarchical multiple regression predicting STAI Y1 scores from sociodemographic variables, health-related items, and COVID-19-related questions in the worker group (N = 478).

| Predictors        | B      | $\beta$ | t         | STAI Y1        |  | Adj R <sup>2</sup> | F         | $\Delta R^2$ | $\Delta F$ |
|-------------------|--------|---------|-----------|----------------|--|--------------------|-----------|--------------|------------|
|                   |        |         |           | 95% CI         |  |                    |           |              |            |
| <b>Model 1</b>    |        |         |           |                |  | 0.059              | 8.420 **  | 0.066        | 8.420 **   |
| Age               | 0.010  | 0.002   | 0.044     | −0.431; 0.451  |  |                    |           |              |            |
| Gender            | −7.001 | −0.244  | −5.421 ** | −9.539; −4.463 |  |                    |           |              |            |
| Marital status    | 2.571  | 0.043   | 0.948     | −2.761; 7.904  |  |                    |           |              |            |
| Educational level | −2.568 | −0.106  | −2.129 *  | −4.938; −0.198 |  |                    |           |              |            |
| <b>Model 2</b>    |        |         |           |                |  | 0.242              | 26.377 ** | 0.185        | 58.215 **  |
| Age               | −0.158 | −0.035  | −0.779    | −0.557; 0.241  |  |                    |           |              |            |
| Gender            | −4.412 | −0.153  | −3.720 ** | −6.742; −2.081 |  |                    |           |              |            |
| Marital status    | 3.028  | 0.050   | 1.242     | −1.763; 7.819  |  |                    |           |              |            |
| Educational level | −2.009 | −0.083  | −1.853    | −4.140; 0.122  |  |                    |           |              |            |
| Health evaluation | −2.273 | −0.273  | −6.763 ** | −2.933; −1.612 |  |                    |           |              |            |
| Health concern    | 1.766  | 0.341   | 8.382 **  | 1.352; 2.180   |  |                    |           |              |            |
| <b>Model 3</b>    |        |         |           |                |  | 0.240              | 17.740 ** | 0.003        | 0.601      |
| Age               | −0.166 | −0.037  | −0.817    | −0.565; 0.233  |  |                    |           |              |            |
| Gender            | −4.286 | −0.149  | −3.592 ** | −6.630; −1.941 |  |                    |           |              |            |
| Marital status    | 3.200  | 0.053   | 1.309     | −1.604; 8.004  |  |                    |           |              |            |
| Educational level | −2.035 | −0.084  | −1.873    | −4.169; 0.100  |  |                    |           |              |            |
| Health evaluation | −2.231 | −0.268  | −6.589 ** | −2.897; −1.566 |  |                    |           |              |            |
| Health concern    | 1.792  | 0.346   | 8.417 **  | 1.373; 2.210   |  |                    |           |              |            |
| COVID-19_1        | −0.291 | −0.012  | −0.273    | −2.386; 1.804  |  |                    |           |              |            |
| COVID-19_2        | 0.045  | 0.001   | 0.028     | −3.091; 3.180  |  |                    |           |              |            |
| COVID-19_3        | −3.159 | −0.051  | −1.255    | −8.105; 1.787  |  |                    |           |              |            |

STAI Y1 = State-Trait Anxiety Inventory Form Y1; CI = Confidence Interval; COVID-19\_1 = Knowing of others who are positive for COVID-19; COVID-19\_2 = Knowing of others who died of COVID-19; COVID-19\_3 = Having had contacts with others positive for COVID-19. \*  $p < .05$ ; \*\*  $p < .01$ .

**Table S2.** Hierarchical multiple regression predicting BDI-II scores from sociodemographic variables, health-related items, and COVID-19-related questions in the worker group (N = 478).

| Predictors        | B      | $\beta$ | t         | BDI-II         |  | Adj R <sup>2</sup> | F         | $\Delta R^2$ | $\Delta F$ |
|-------------------|--------|---------|-----------|----------------|--|--------------------|-----------|--------------|------------|
|                   |        |         |           | 95% CI         |  |                    |           |              |            |
| <b>Model 1</b>    |        |         |           |                |  | 0.028              | 4.450 **  | 0.036        | 4.450 **   |
| Age               | 0.084  | 0.025   | 0.480     | −0.260; 0.428  |  |                    |           |              |            |
| Gender            | −3.317 | −0.150  | −3.290 ** | −5.299; −1.336 |  |                    |           |              |            |
| Marital status    | 0.710  | 0.015   | 0.335     | −3.453; 4.873  |  |                    |           |              |            |
| Educational level | −2.677 | −0.144  | −2.841 ** | −4.529; −0.826 |  |                    |           |              |            |
| <b>Model 2</b>    |        |         |           |                |  | 0.143              | 14.230 ** | 0.117        | 32.598 **  |
| Age               | −0.078 | −0.023  | −0.472    | −0.404; 0.247  |  |                    |           |              |            |
| Gender            | −2.494 | −0.113  | −2.573 *  | −4.399; −0.589 |  |                    |           |              |            |
| Marital status    | 1.429  | 0.031   | 0.717     | −2.485; 5.343  |  |                    |           |              |            |
| Educational level | −2.253 | −0.121  | −2.542 *  | −3.995; −0.511 |  |                    |           |              |            |
| Health evaluation | −2.198 | −0.343  | −7.994 ** | −2.739; −1.658 |  |                    |           |              |            |

|                   |        |        |           |                |       |          |       |       |
|-------------------|--------|--------|-----------|----------------|-------|----------|-------|-------|
| Health concern    | 0.196  | 0.049  | 1.135     | -0.143; 0.534  |       |          |       |       |
| <b>Model 3</b>    |        |        |           |                | 0.143 | 9.859 ** | 0.006 | 1.100 |
| Age               | -0.088 | -0.026 | -0.533    | -0.414; 0.238  |       |          |       |       |
| Gender            | -2.471 | -0.112 | -2.538 *  | -4.385; -0.557 |       |          |       |       |
| Marital status    | 1.521  | 0.033  | 0.763     | -2.398; 5.439  |       |          |       |       |
| Educational level | -2.287 | -0.123 | -2.579 ** | -4.030; -0.544 |       |          |       |       |
| Health evaluation | -2.192 | -0.342 | -7.925 ** | -2.736; -1.649 |       |          |       |       |
| Health concern    | 0.216  | 0.054  | 1.241     | -0.126; 0.558  |       |          |       |       |
| COVID-19_1        | 0.622  | 0.034  | 0.715     | -1.088; 2.332  |       |          |       |       |
| COVID-19_2        | 0.670  | 0.024  | 0.515     | -1.888; 3.228  |       |          |       |       |
| COVID-19_3        | -3.182 | -0.067 | -1.550    | -7.216; 0.853  |       |          |       |       |

BDI-II = Beck Depression Inventory; CI = Confidence Interval; COVID-19\_1 = Knowing of others who are positive for COVID-19; COVID-19\_2 = Knowing of others who died of COVID-19; COVID-19\_3 = Having had contacts with others positive for COVID-19. \*  $p < .05$ ; \*\*  $p < .01$ .
